# Supplementary material for: A prognostic model for advanced colorectal neoplasia recurrence
Source: Springer Nature journal article supplement (doi:10.1007/s10552-016-0795-5), 2016-08-12
Supplement: MOESM1 [file 10581050]

**Supporting Information**

**Table S1. Goodness-of-fit test results on validation data: predicted advanced neoplasia using predictive model vs. observed advanced neoplasia**

| Risk group | Total | Predicted AN (n) | Observed AN (n) | Predicted to observed ratio |
| --- | --- | --- | --- | --- |
| 1 | 212 | 10 | 10 | 1.00 |
| 2 | 211 | 13.2 | 14 | 0.94 |
| 3 | 211 | 15.8 | 20 | 0.79 |
| 4 | 212 | 18.9 | 17 | 1.11 |
| 5 | 211 | 21.8 | 32 | 0.68 |
| 6 | 211 | 24.8 | 24 | 1.03 |
| 7 | 212 | 29.1 | 31 | 0.94 |
| 8 | 211 | 34.2 | 36 | 0.95 |
| 9 | 211 | 42.5 | 50 | 0.85 |
| 10 | 211 | 64.5 | 55 | 1.17 |

Goodness-of-fittest statistic = 10.79 (based on deciles of risk); degrees of freedom = 8; p = 0.214.
